# Supplementary material for: A Study of 3CLpros as Promising Targets against SARS-CoV and SARS-CoV-2
Source: Microorganisms. 2021 Apr 3;9(4):756. doi: 10.3390/microorganisms9040756 (PMC8065850; doi:10.3390/microorganisms9040756)

# **A study of 3CLpros as promising targets against SARS-CoV and SARS-CoV-2**

Seri Jo, Suwon Kim, Jahyun Yoo, Mi-Sun Kim and Dong Hae Shin\*

College of Pharmacy and Graduates School of Pharmaceutical Sciences, Ewha W.

University, Seoul, Republic of Korea 03760

## **Supplementary Figure 1. The purification of SARS-CoV-2 3CLpro**

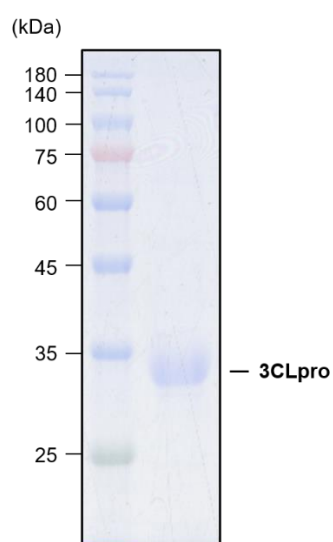

Supplement: Supplementary file 1 [file microorganisms-09-00756-s001.pdf]
